# Supplementary material for: Biocatalytic Synthesis of Flavor Ester “Pentyl Valerate” UsingCandida rugosaLipase Immobilized in Microemulsion Based Organogels: Effect of Parameters and Reusability
Source: Hindawi journal article supplement (doi:10.1155/2014/353845), 2014-01-01
Supplement: f1 [file 353845.f1.pdf]

### **Supplementary information**

#### **Biocatalytic synthesis of flavor ester ‘pentyl valerate’ using lipase immobilized in microemulsion based organogels: Impact of parameters on ester production**

Tripti Raghavendra<sup>1</sup>, Nilam Panchal<sup>1</sup>, Jyoti Divecha<sup>2</sup>, Amita Shah<sup>1</sup>, Datta Madamwar\*<sup>1</sup>

1. BRD School of Biosciences, Sardar Patel Maidan, Satellite Campus, Vadtal Road, Post Box No. 39, Sardar Patel University, Vallabh Vidyanagar – 388 120, Gujarat, India
2. Department of Statistics, Sardar Patel University, Vallabh Vidyanagar – 388 120, Gujarat, India

\* Corresponding author:

Tel: +91 2692 229380

Fax: +91 2692 231042

E-mail address: datta\_madamwar@yahoo.com (D. Madamwar)

raghavendra.tripti@gmail.com (T. Raghavendra)

**Table S1:**  $W_o$  and  $P_o$  values of the reverse micellar systems prepared using the four surfactants AOT, CTAB, Tween 80 and Triton X-100 in combination with the three organic solvents n-hexane, n-heptane and isooctane. 1-hexanol was used as the co-surfactant in case of CTAB, Tween 80 and Triton X-100.

| Surfactant          | Organic solvents |       |          |       |           |       |
|---------------------|------------------|-------|----------|-------|-----------|-------|
|                     | Isooctane        |       | n-hexane |       | n-heptane |       |
|                     | $W_o$            | $P_o$ | $W_o$    | $P_o$ | $W_o$     | $P_o$ |
| <b>AOT</b>          | 60               | -     | 50       | -     | 70        | -     |
| <b>CTAB</b>         | 30               | 14.43 | 60       | 12.83 | 80        | 9.62  |
| <b>Triton X 100</b> | 50               | 15.92 | 30       | 14.43 | 50        | 19.24 |
| <b>Tween 80</b>     | 40               | 12.83 | 40       | 11.22 | 50        | 16.04 |

**Table S2: The analysis of variance (ANOVA) for esterification (%)**

| Source         | Degree of freedom | Sum of squares | Mean of squares | F value | P value      |
|----------------|-------------------|----------------|-----------------|---------|--------------|
| Blocks         | 9                 | 2702.1         | 60.81           | 1.06    | 0.404        |
| Regression     | 20                | 28242.2        | 1412.11         | 24.66   | <b>0.000</b> |
| Linear         | 5                 | 22895.2        | 4541.32         | 79.29   | <b>0.000</b> |
| Square         | 5                 | 3009.4         | 524.09          | 9.15    | <b>0.000</b> |
| Interaction    | 10                | 2337.6         | 233.76          | 4.08    | <b>0.000</b> |
| Residual error | 60                | 3436.4         | 57.27           | -       | -            |
| Lack of fit    | 58                | 3406.5         | 58.73           | 3.92    | 0.224        |
| Pure error     | 20                | 29.9           | 14.97           | -       | -            |
| Total          | 89                | 34380.7        | -               | -       | -            |

$$R^2 = 0.90 \quad R^2_{adj} = 0.85$$

**Table S3:** Estimation of residual water using Karl-Fischer titration and TGA weight loss curves

| <b>Organogel</b>                             | <b>Karl-Fischer titration</b> | <b>TGA weight loss analysis</b> |                  |
|----------------------------------------------|-------------------------------|---------------------------------|------------------|
|                                              | <b>Water (%)</b>              | <b>Residual weight (%)</b>      | <b>Water (%)</b> |
| <b>Fresh</b>                                 | 10.86 ± 0.9                   | 88.16 ± 2                       | 11.84            |
| <b>Reused</b>                                | 14.65 ± 2                     | 87.75 ± 0.9                     | 12.25            |
| <b>Reused and treated with AOT/isooctane</b> | 8.23 ± 3                      | 89.27± 2                        | 10.73            |

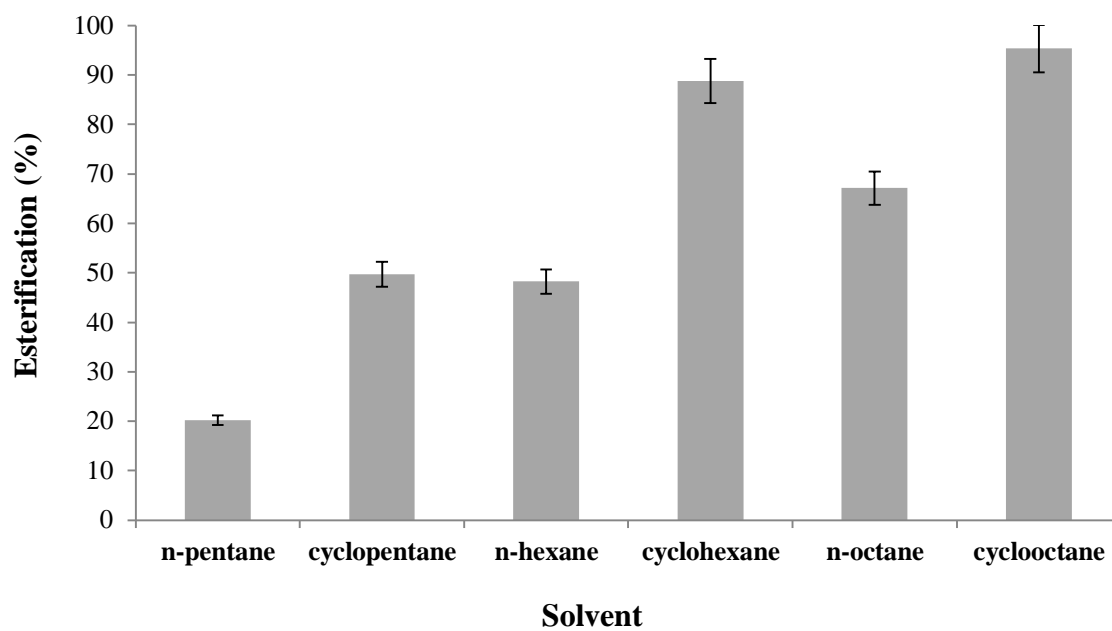

**Figure S1:** Effect of straight chain and cyclic hydrocarbons on ester synthesis. The reaction was carried out using AOT/isooctane/gelatin MBGs at 37 °C and 150 rpm for 96h.
